# Supplementary material
Source: HighWire-hosted journal article supplement (https://jnm.snmjournals.org/highwire/filestream/95302/field_highwire_adjunct_files/0/207696_Supplemental_Data.pdf)
Supplement: 207696_Supplemental_Data.pdf [file 207696_Supplemental_Data.pdf]

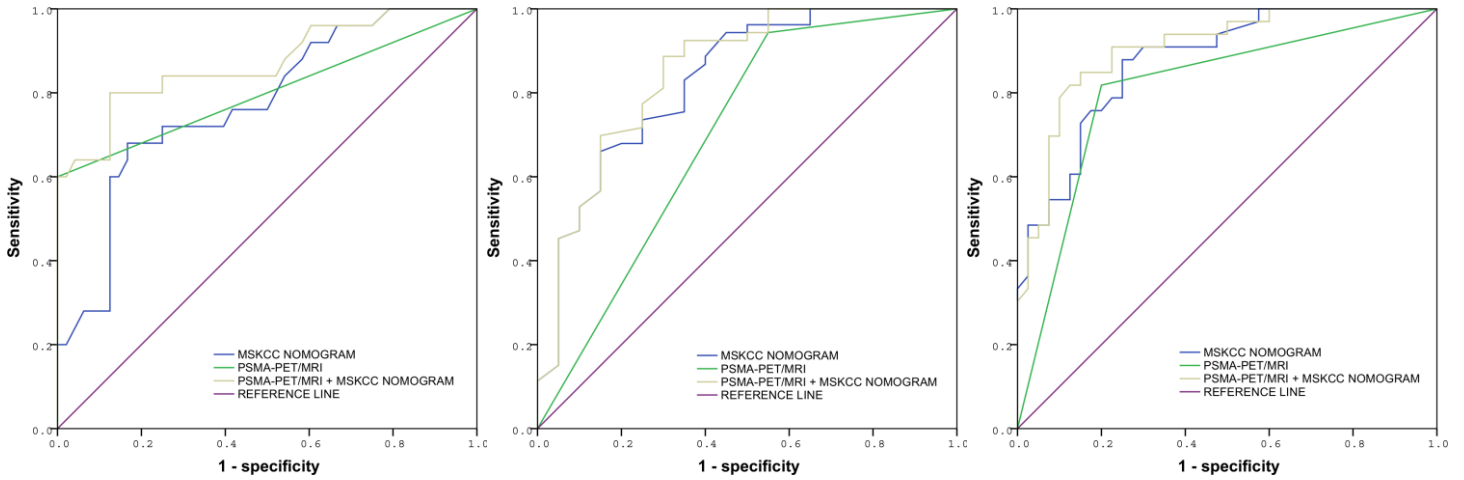

**Supplemental Fig. 1:** Receiver operating characteristic curves for simultaneous  $^{68}\text{Ga}$ -PSMA-11 PET/MRI, preoperative MSKCC nomogram and a model containing both modalities for detection of lymph node metastases (A), ECE (B) and SVI (C).

**Supplemental Table 1.** <sup>68</sup>Ga-PSMA-11 PET/MR protocol – Imaging parameters for multiparametric magnetic resonance imaging on the 3-T Siemens Biograph mMR

| Sequence      | Technique                      | Repetition Time/Echo Time (msec) | Flip Angle (degrees) | Section thickness (mm) | Feld of View (mm) | Matrix  | Parallel Imaging Factor | No. of signals acquired | Time (min:sec) |
|---------------|--------------------------------|----------------------------------|----------------------|------------------------|-------------------|---------|-------------------------|-------------------------|----------------|
| T2 weighted   | 3D turbo spin echo             | 1700/101                         | 135                  | 1                      | 230               | 320x290 | 2                       | 1.5                     | 8:01           |
| DW imaging *  | axial single-shot echo-planar  | 5200/93                          | -                    | 3.6                    | 260               | 160x120 | 2                       | 8                       | 6:32           |
| DCE imaging † | Axial 3D spoiled gradient echo | 6.06/2.01                        | 12                   | 3.6                    | 180               | 128x88  | 2                       | -                       | 4:59           |

\* Performed by using *b* values of 0, 400 and 800 sec/mm<sup>2</sup>.

† Performed by using a temporal resolution of 5.5 seconds and 55 acquisitions after contrast agent injection during a total imaging time of 5 minutes 5 seconds, with the start of the first acquisition corresponding with the start of the contrast agent injection.
